# Supplementary material for: Retrospective case–control study to evaluate hypocalcaemia as a distinguishing feature of COVID-19 compared with other infective pneumonias and its association with disease severity
Source: HighWire-hosted journal article supplement (doi:10.1136/bmjopen-2021-053810), 2021-12-01
Supplement: bmjopen-2021-053810supp004_data_supplement.pdf [file bmjopen-2021-053810supp004_data_supplement.pdf]

**Supplementary Table 1** LOS in hypocalcaemic patients with non-COVID pneumonia

| Community Aacquired Pneumonia |     |        |         | Viral Pneumonia |        |         |
|-------------------------------|-----|--------|---------|-----------------|--------|---------|
| Calcium                       | Low | Normal | P value | Low             | Normal | P value |
| Median LOS (days)             | 6   | 5      | 0.74    | 4               | 4      | 0.47    |

LOS in hypocalcaemic (corrected calcium < 2.2mmol/L) and normocalcaemic ( $\geq$  2.2mmol/L) patients with Community Acquired Pneumonia (CAP) and Viral Pneumonia (VP). LOS= length of stay
