# Supplementary figures and images for: Retrospective case–control study to evaluate hypocalcaemia as a distinguishing feature of COVID-19 compared with other infective pneumonias and its association with disease severity
Source: HighWire-hosted journal article supplement (doi:10.1136/bmjopen-2021-053810), 2021-12-01

## Supplementary Figure 1

A

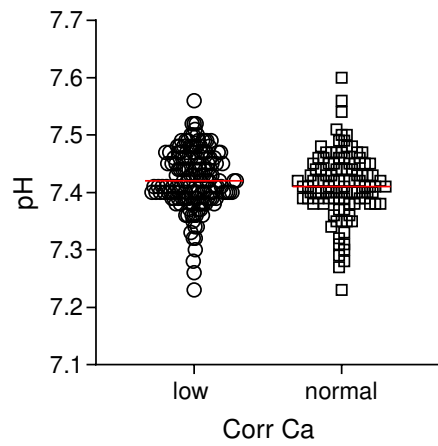

B

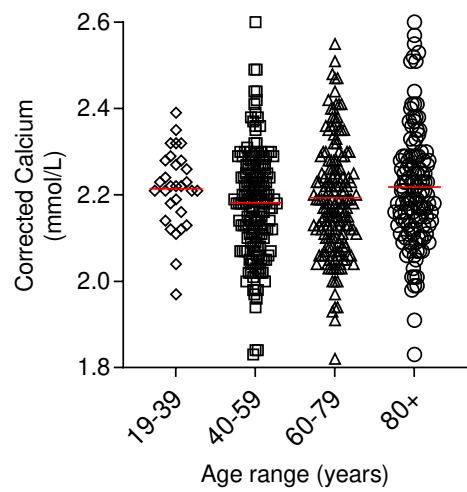

Supplement: bmjopen-2021-053810supp002_data_supplement.pdf [file bmjopen-2021-053810supp002_data_supplement.pdf]

Supplementary Figure 3

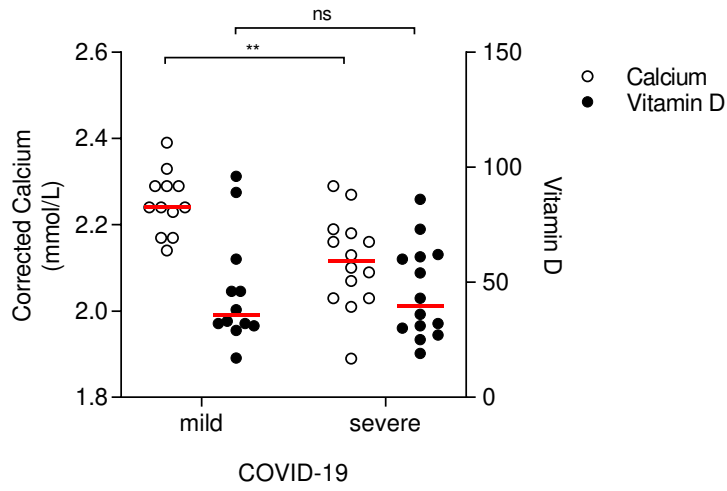

Supplement: bmjopen-2021-053810supp006_data_supplement.pdf [file bmjopen-2021-053810supp006_data_supplement.pdf]
